# Supplementary material for: Curcumin Derivatives as Potential Mosquito Larvicidal Agents against Two Mosquito Vectors, Culex pipiens and Aedes albopictus
Source: MDPI journal article supplement (doi:10.3390/ijms22168915), 2021-08-18
Supplement: s1 [file s1]

# Curcumin Derivatives as Potential Mosquito Larvicidal Agents against Two Mosquito Vectors, *Culex pipiens* and *Aedes albopictus*

Dimitris Matiadis <sup>1</sup>, Panagiota G. V. Liggri <sup>2,3</sup>, Eftichia Kritsi <sup>4,5</sup>, Niki Tzioumaki <sup>2,3</sup>, Panagiotis Zoumpoulakis <sup>4,5</sup>, Dimitrios P. Papachristos <sup>3</sup>, George Balatsos <sup>3</sup>, Marina Sagnou <sup>1,\*</sup> and Antonios Michaelakis <sup>3,\*</sup>

<sup>1</sup> Institute of Biosciences and Applications, National Centre for Scientific Research “Demokritos”, 153 10 Athens, Greece; matiadis@bio.demokritos.gr

<sup>2</sup> Department of Biochemistry and Biotechnology, University of Thessaly, Biopolis, 41500 Larissa, Greece

<sup>3</sup> Benaki Phytopathological Institute, Scientific Directorate of Entomology and Agricultural Zoology, 14561 Kifissia, Greece; p.liggri@bpi.gr (P.G.V.L.); nikitzioumaki@gmail.com (N.T.); d.papachristos@bpi.gr (D.P.P.); g.balatsos@bpi.gr (G.B.)

<sup>4</sup> Institute of Chemical Biology, National Hellenic Research Foundation, 48 Vas. Constantinou Avenue, 11635 Athens, Greece; ekritsi@eie.gr (E.K.); pzoump@uniwa.gr (P.Z.)

<sup>5</sup> Department of Food Science and Technology, University of West Attica, Ag. Spyridonos, 12243 Egaleo, Greece

\*Correspondence: [sagnou@bio.demokritos.gr](mailto:sagnou@bio.demokritos.gr) (MS), [a.michaelakis@bpi.gr](mailto:a.michaelakis@bpi.gr) (AM)

## Supporting Information

### Contents

NMR spectra

2

## NMR spectra

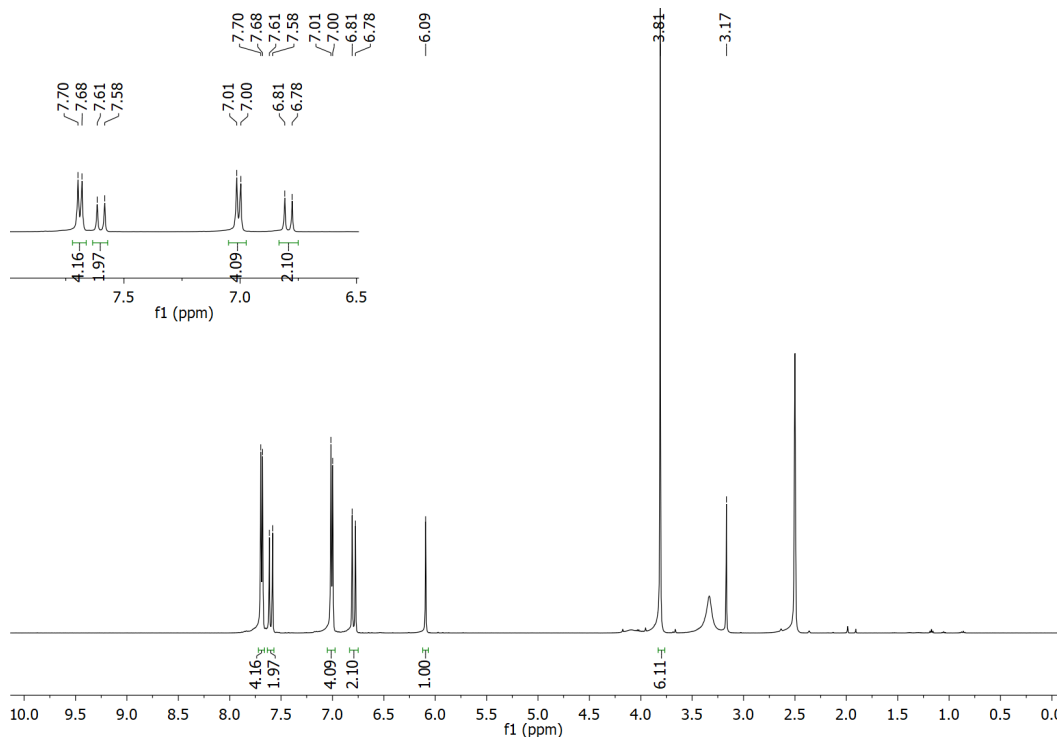

**Figure S1.**  $^1\text{H}$  NMR spectrum of compound (1*E*,6*E*)-1,7-bis(4-methoxyphenyl)hepta-1,6-diene-3,5-dione **1a** in  $\text{DMSO-}d_6$ .

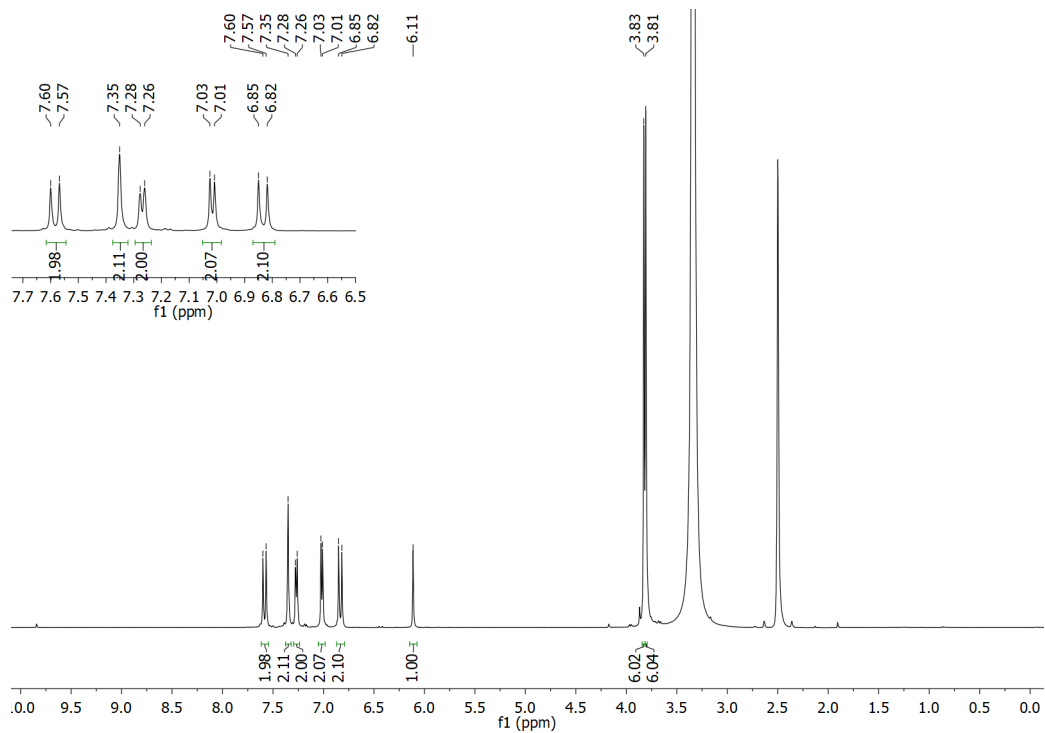

**Figure S2.**  $^1\text{H}$  NMR spectrum of compound (1*E*,6*E*)-1,7-bis(3,4-dimethoxyphenyl)hepta-1,6-diene-3,5-dione **1b** in  $\text{DMSO-}d_6$ .

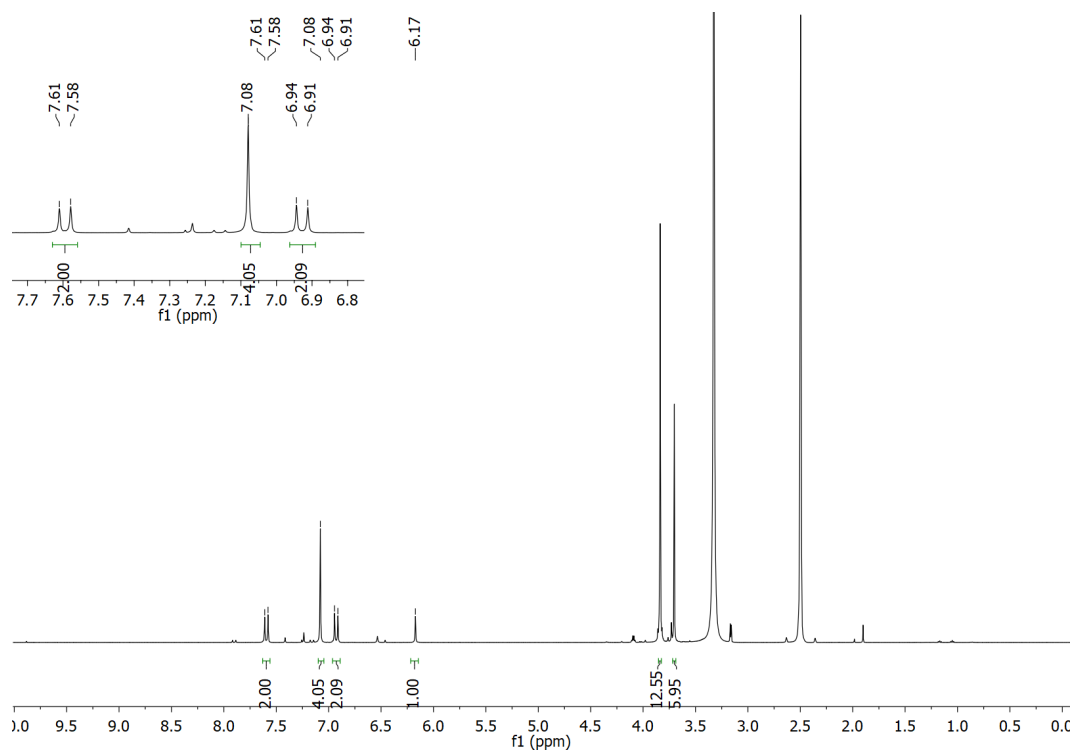

**Figure S3.** <sup>1</sup>H NMR spectrum of compound (1*E*,6*E*)-1,7-bis(3,4,5-trimethoxyphenyl)hepta-1,6-diene-3,5-dione **1c** in DMSO-*d*<sub>6</sub>.

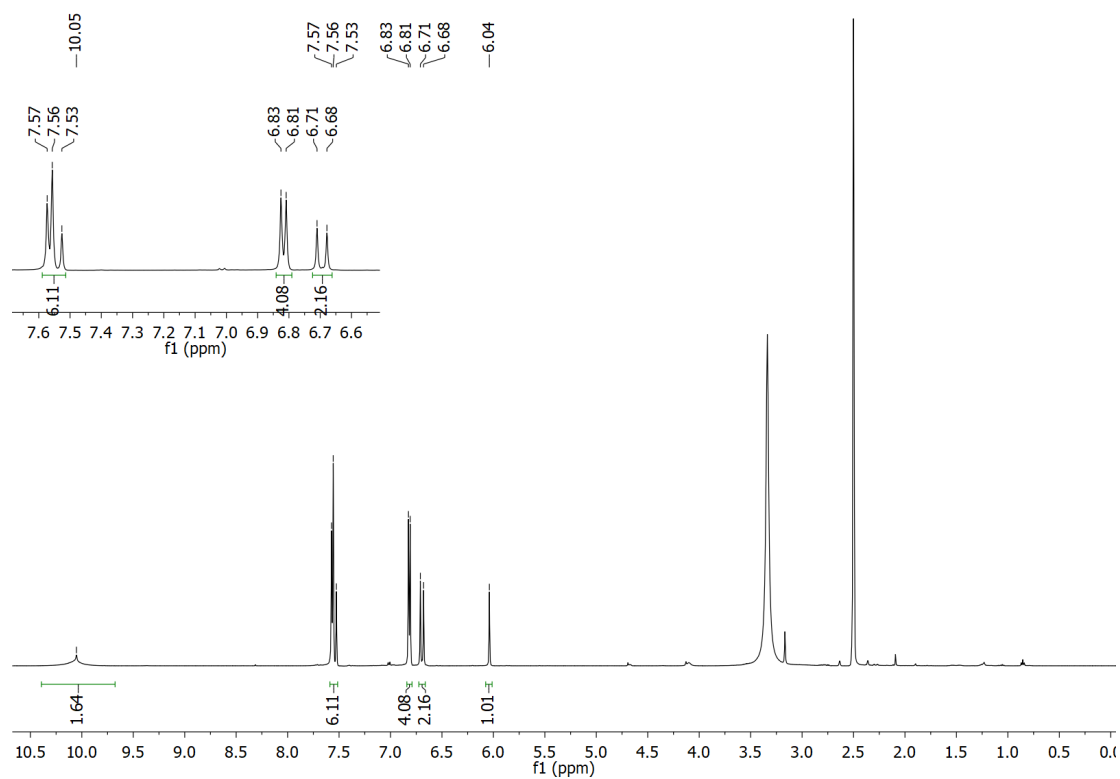

**Figure S4.** <sup>1</sup>H NMR spectrum of compound (1*E*,6*E*)-1,7-bis(4-hydroxyphenyl)hepta-1,6-diene-3,5-dione **1d** in DMSO-*d*<sub>6</sub>.

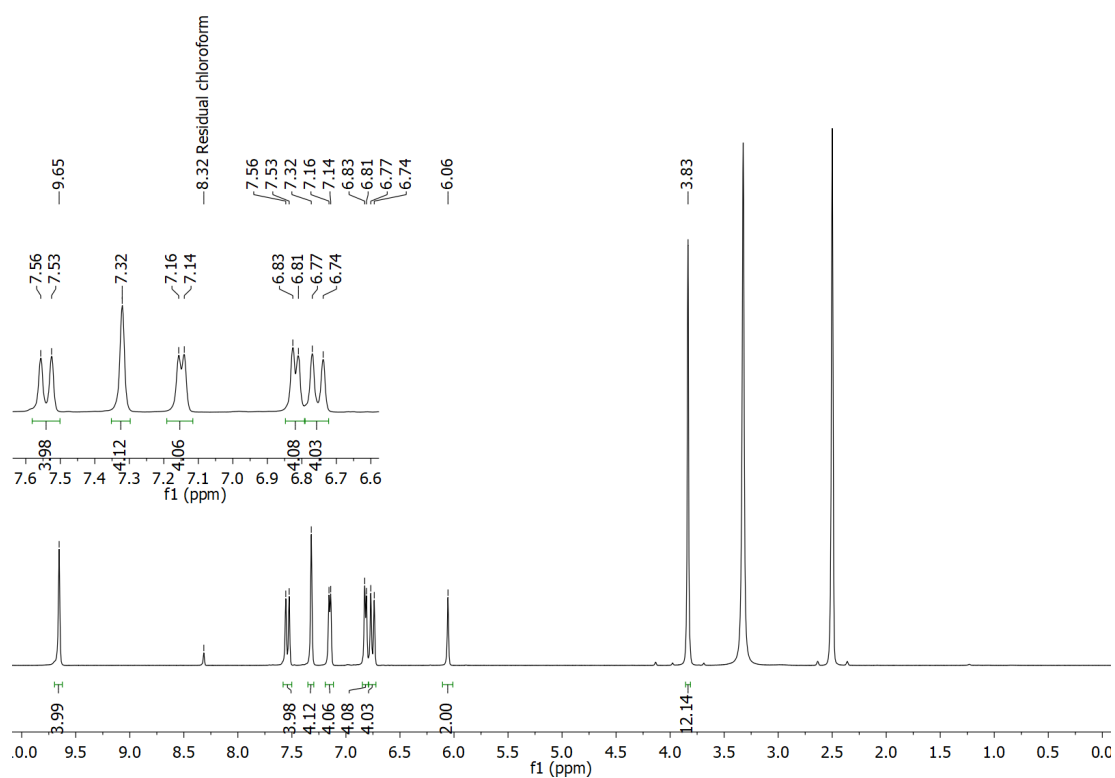

**Figure S5.** <sup>1</sup>H NMR spectrum of compound (1*E*,6*E*)-1,7-bis(4-hydroxy-3-methoxyphenyl)hepta-1,6-diene-3,5-dione **1f** in DMSO-*d*<sub>6</sub>.

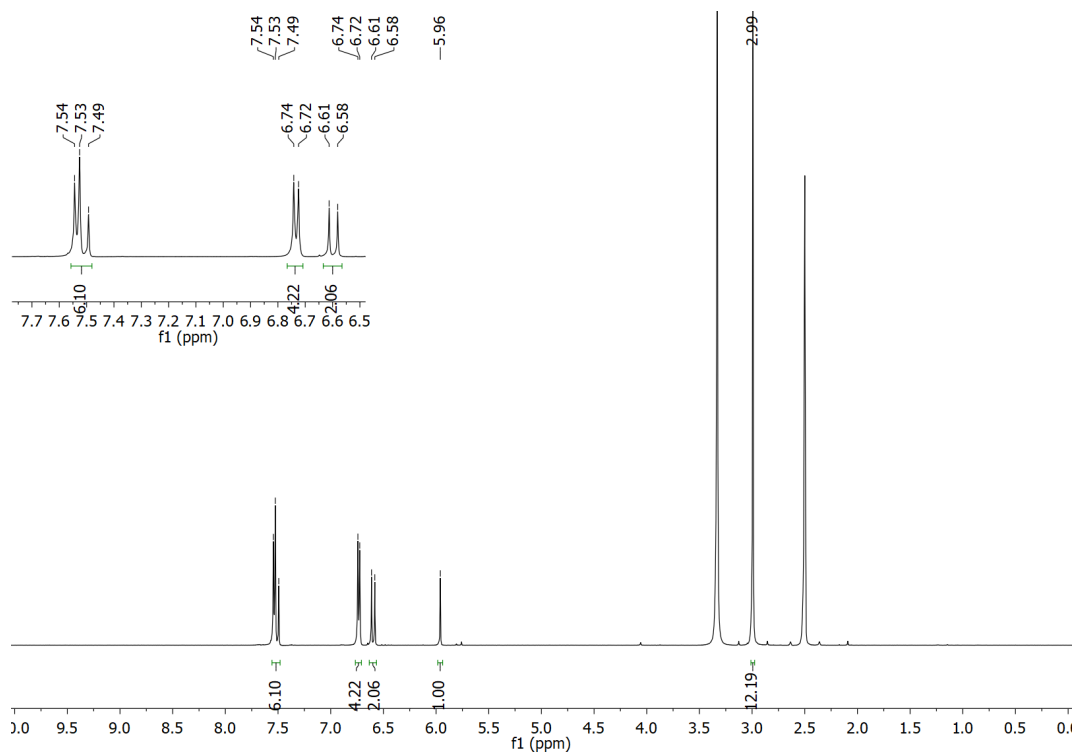

**Figure S6.** <sup>1</sup>H NMR spectrum of compound (1*E*,6*E*)-1,7-bis(4-(dimethylamino)phenyl)hepta-1,6-diene-3,5-dione **1g** in DMSO-*d*<sub>6</sub>.

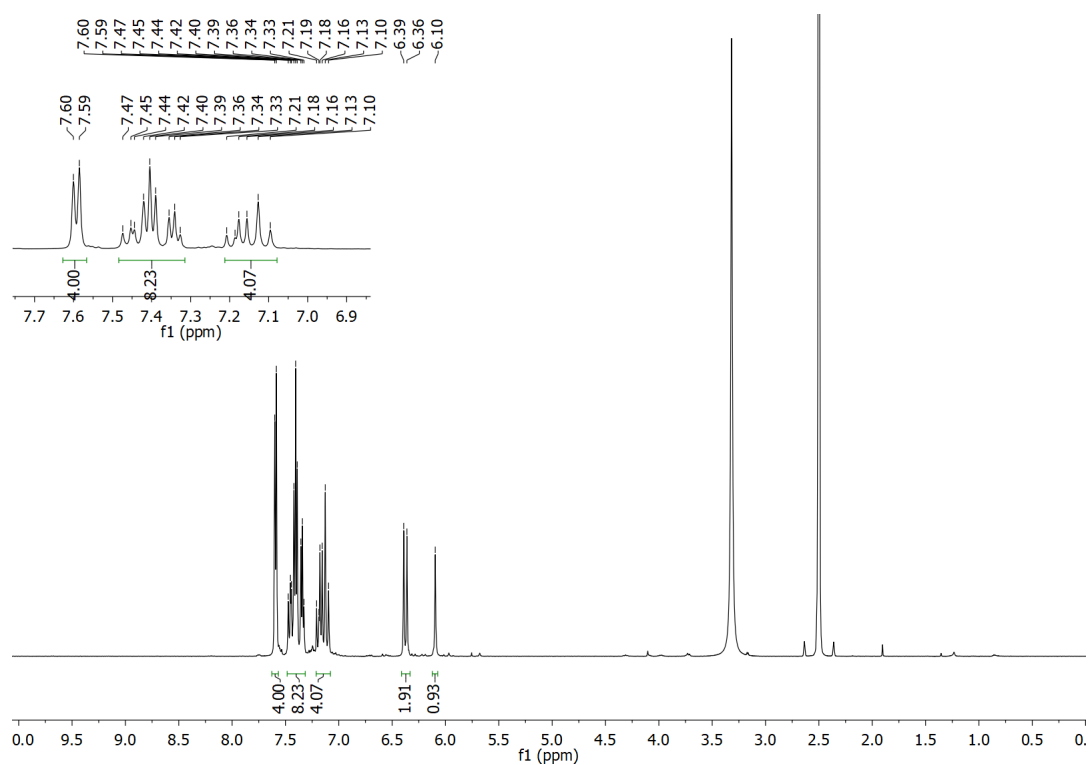

**Figure S7.**  $^1\text{H}$  NMR spectrum of compound (1*E*,3*E*,8*E*,10*E*)-1,11-diphenylundeca-1,3,8,10-tetraene-5,7-dione **1h** in  $\text{DMSO}-d_6$ .

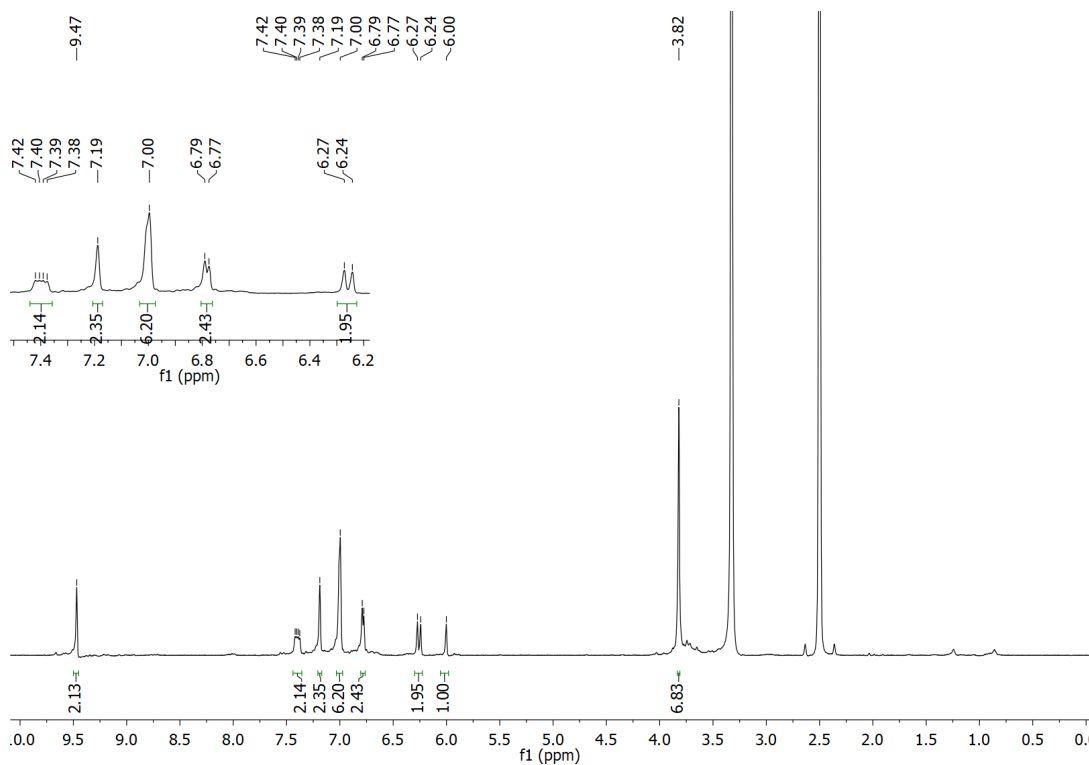

**Figure S8.**  $^1\text{H}$  NMR spectrum of compound (1*E*,3*E*,8*E*,10*E*)-1,11-bis(4-hydroxy-3-methoxyphenyl)undeca-1,3,8,10-tetraene-5,7-dione **1i** in  $\text{DMSO}-d_6$ .

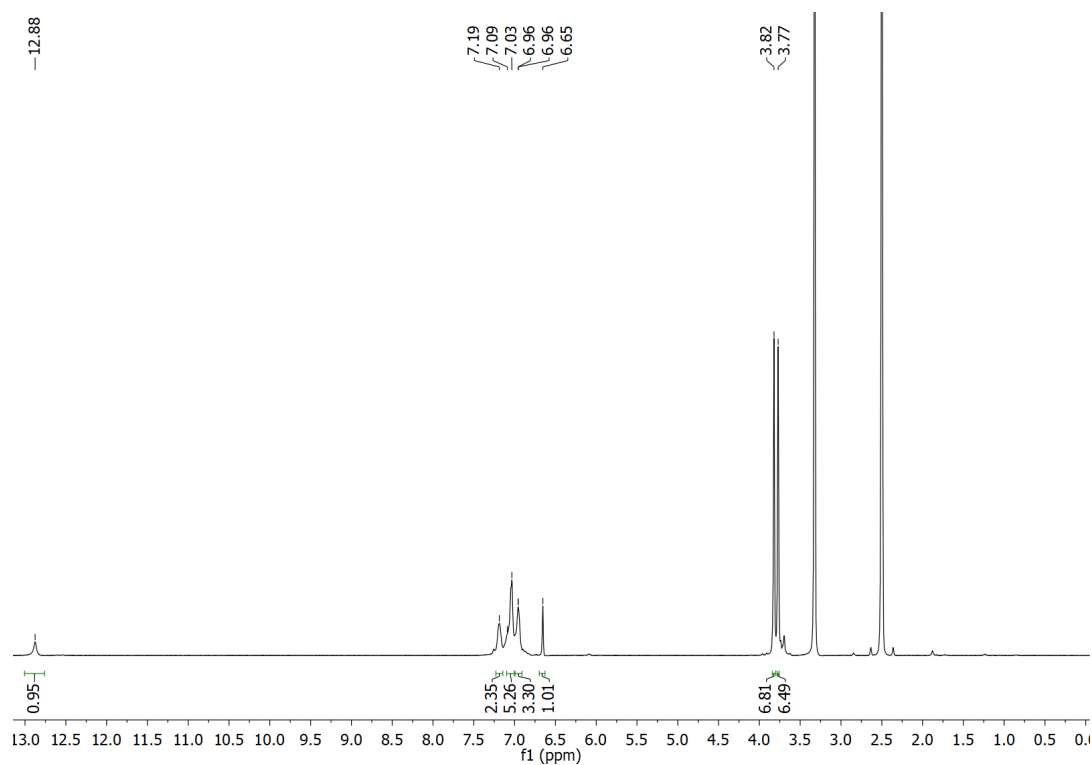

**Figure S9.**  $^1\text{H}$  NMR spectrum of compound 4,4'-((1*E*,1'*E*)-(1*H*-pyrazole-3,5-diyl)bis(ethene-2,1-diyl))bis(2-methoxyphenol) **2** in  $\text{DMSO-}d_6$ .

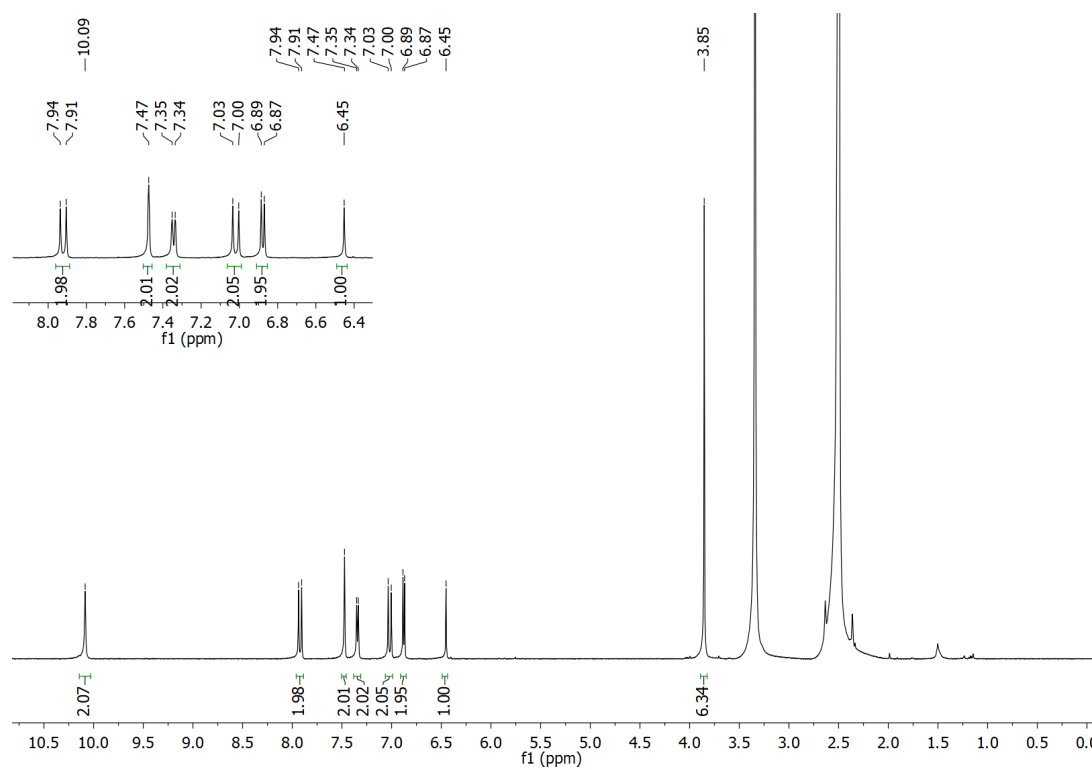

**Figure S10.**  $^1\text{H}$  NMR spectrum of compound (1*E*,6*E*)-1,7-bis(4-hydroxy-3-methoxyphenyl)hepta-1,6-diene-3,5-dione- $\text{BF}_2$  complex **3f** in  $\text{DMSO-}d_6$ .

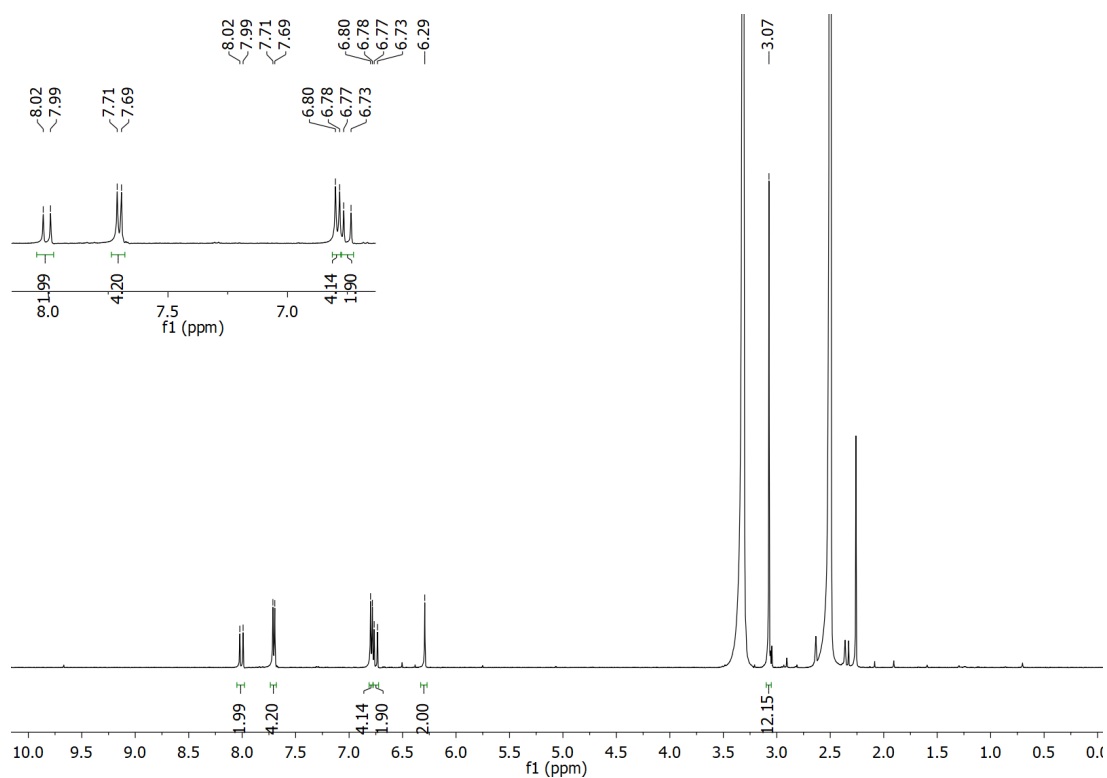

**Figure S11.** <sup>1</sup>H NMR spectrum of compound (1*E*,6*E*)-1,7-bis(4-(dimethylamino)phenyl)hepta-1,6-diene-3,5-dione-BF<sub>2</sub> complex **3g** in DMSO-*d*<sub>6</sub>.

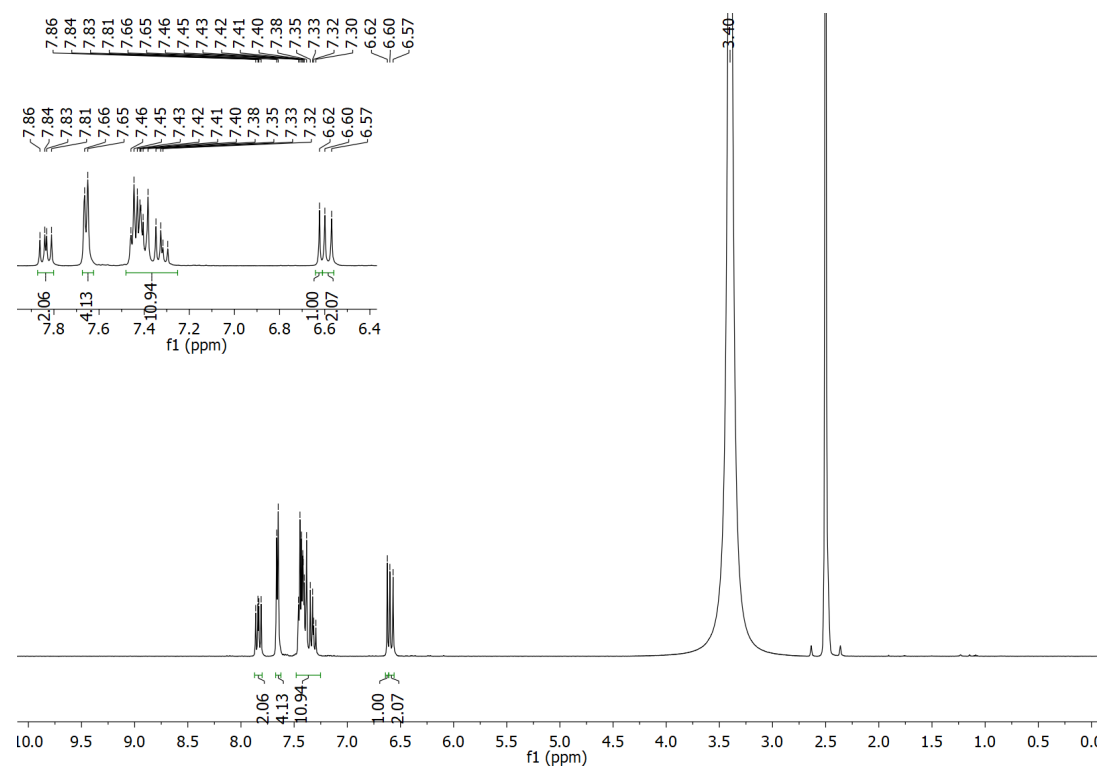

**Figure S12.** <sup>1</sup>H NMR spectrum of compound (1*E*,3*E*,8*E*,10*E*)-1,11-diphenylundeca-1,3,8,10-tetraene-5,7-dione-BF<sub>2</sub> complex **3h** in DMSO-*d*<sub>6</sub>.

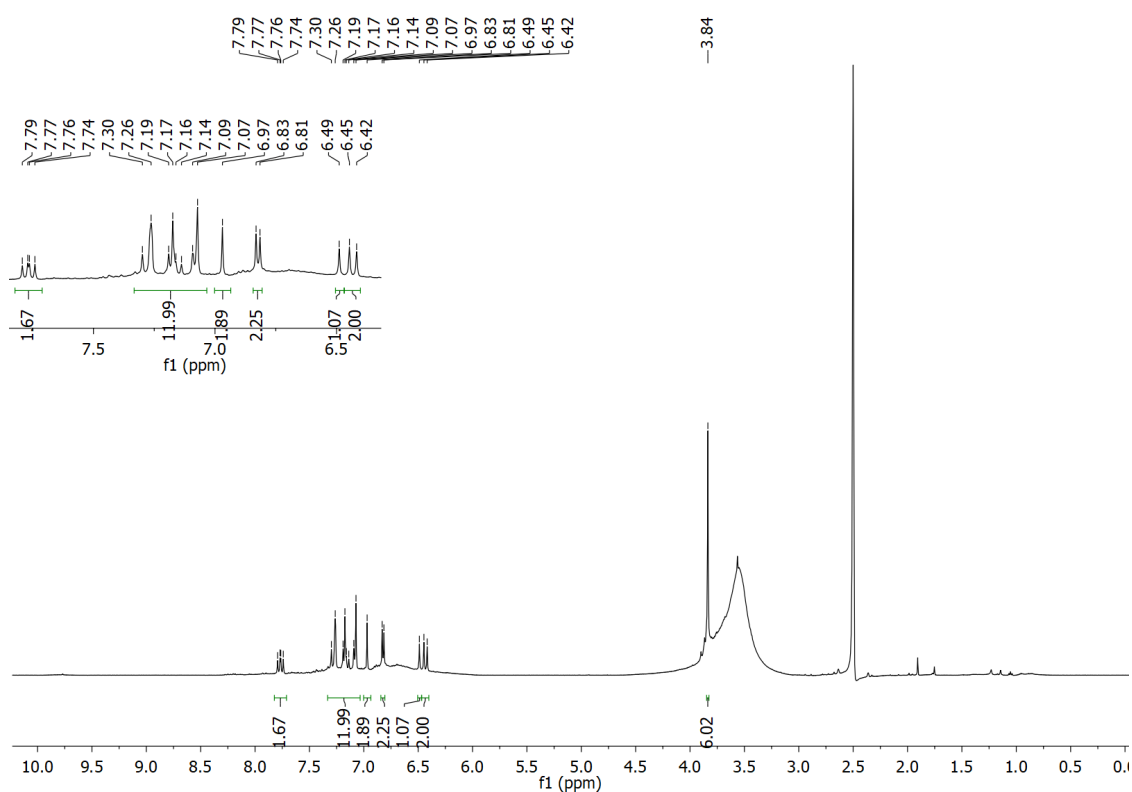

**Figure S13.** <sup>1</sup>H NMR spectrum of compound (1*E*,3*E*,8*E*,10*E*)-1,11-bis(4-hydroxy-3-methoxyphenyl)undeca-1,3,8,10-tetraene-5,7-dione-BF<sub>2</sub> complex **3i** in DMSO-*d*<sub>6</sub>.

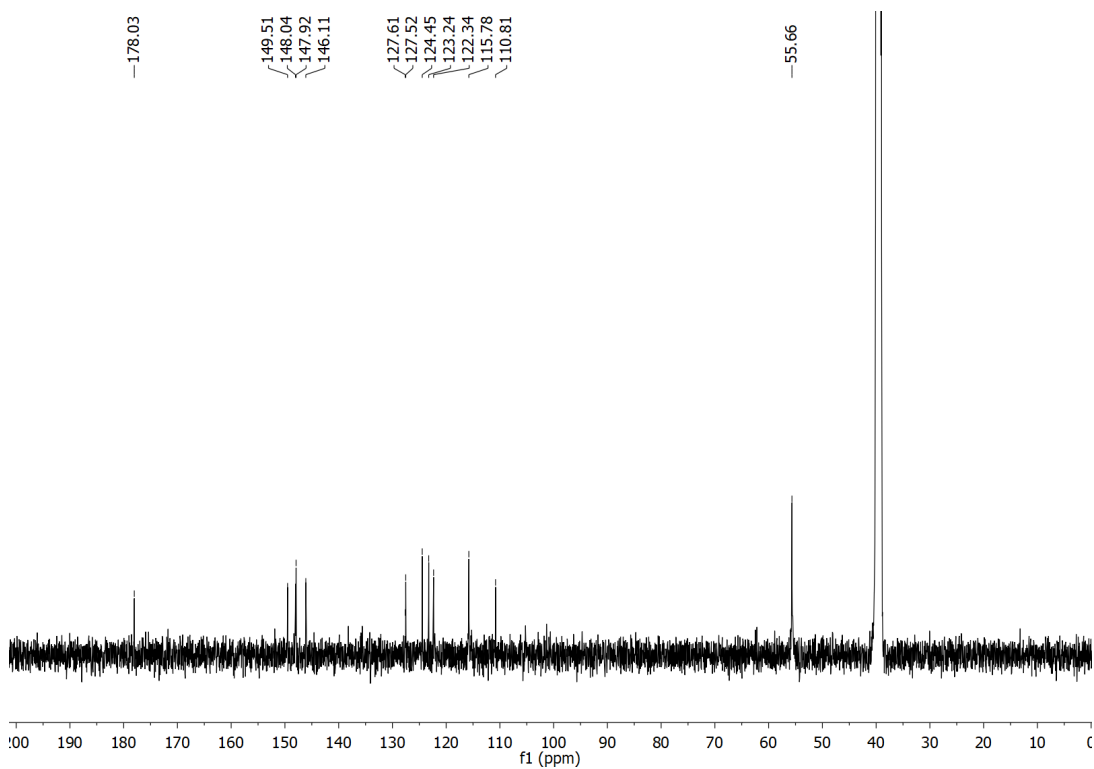

**Figure S14.** <sup>13</sup>C NMR spectrum of compound **3i** in DMSO-*d*<sub>6</sub>.



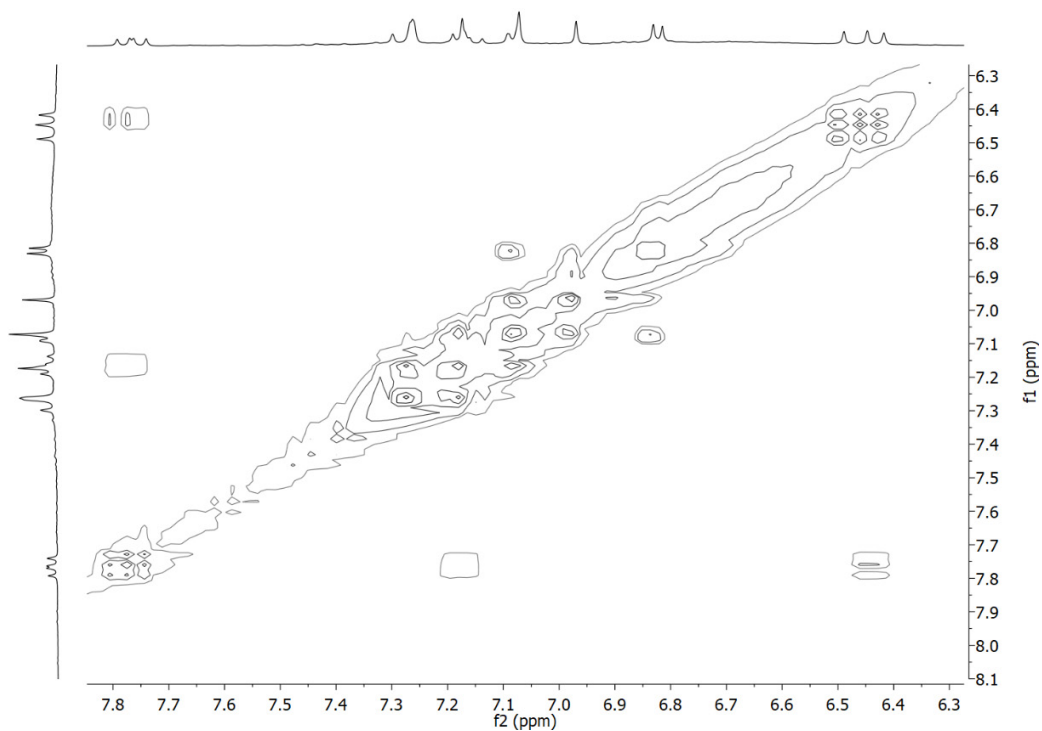

**Figure S15.**  $^1\text{H}$ - $^1\text{H}$  COSY spectrum of compound **3i** in  $\text{DMSO-}d_6$ .

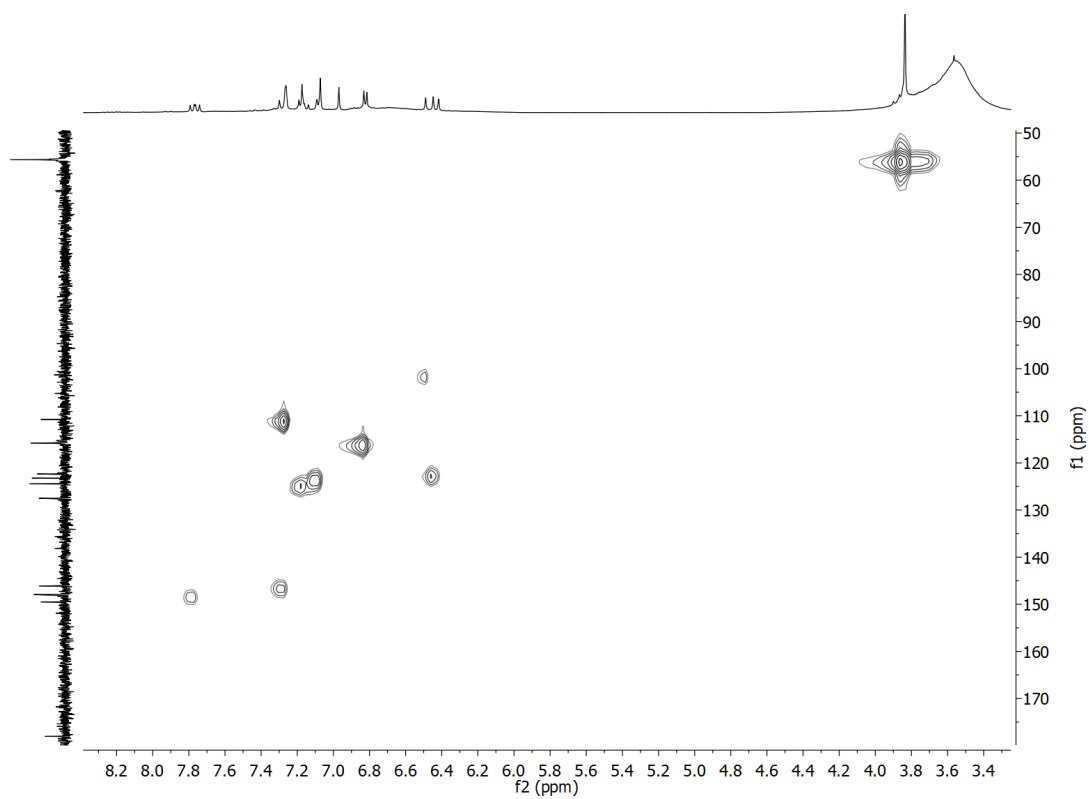

**Figure S16.**  $^1\text{H}$ - $^{13}\text{C}$  HSQC spectrum of compound **3i** in  $\text{DMSO-}d_6$ .

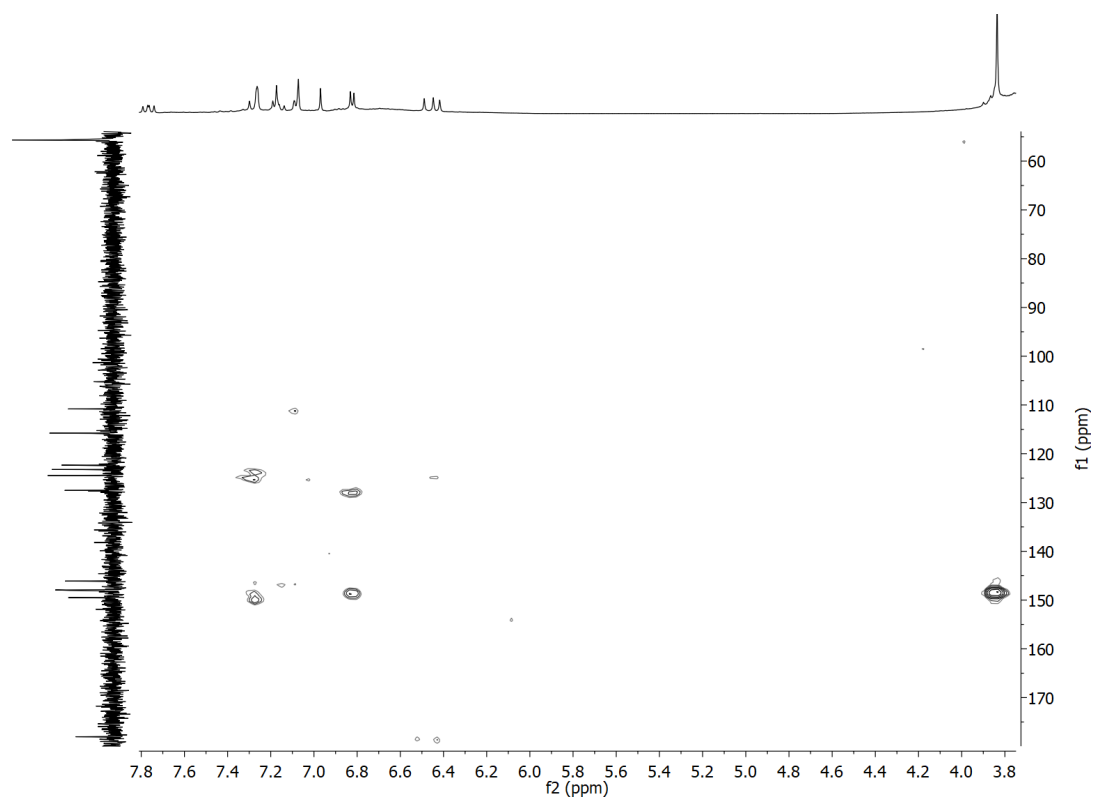

**Figure S17.**  $^1\text{H}$ - $^{13}\text{C}$  HMBC spectrum of compound **3i** in  $\text{DMSO}-d_6$ .

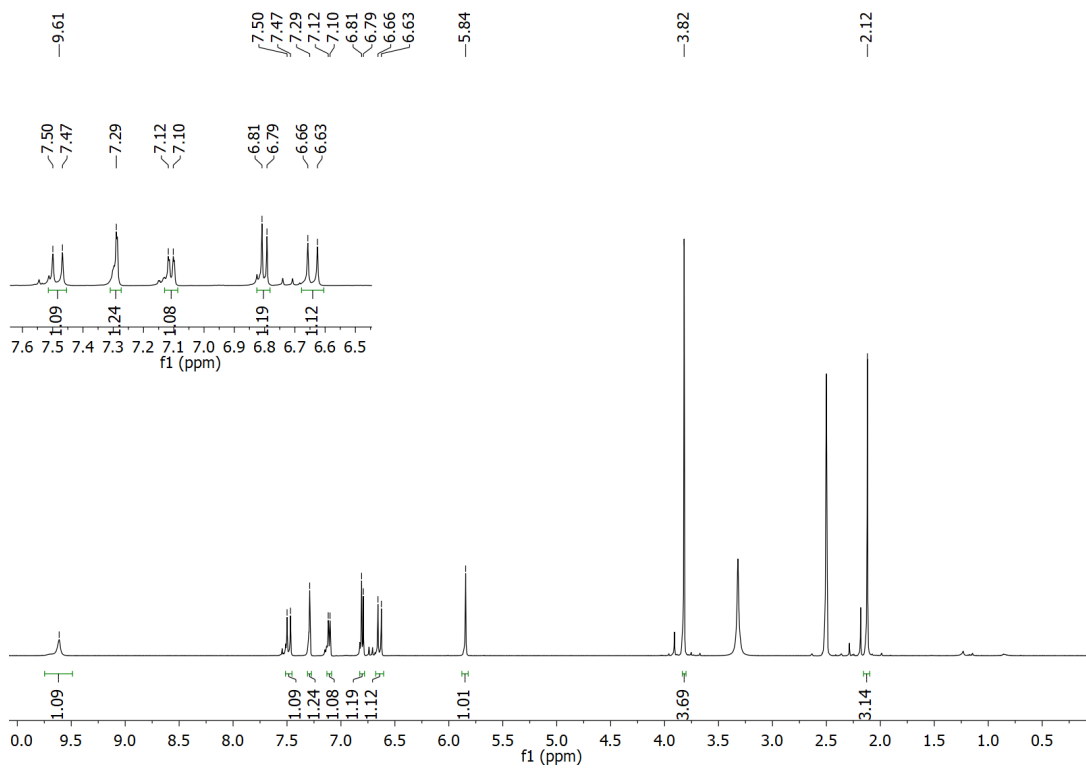

**Figure S18.**  $^1\text{H}$  NMR spectrum of compound (*E*)-6-(4-hydroxy-3-methoxyphenyl)hex-5-ene-2,4-dione **4** in  $\text{DMSO}-d_6$ .

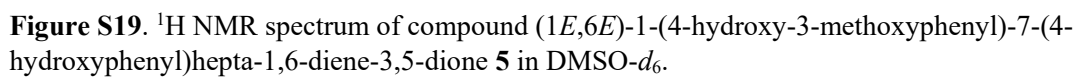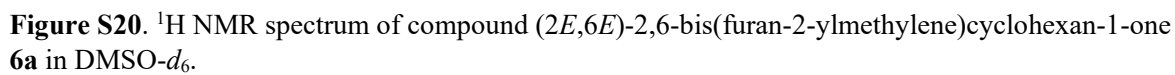

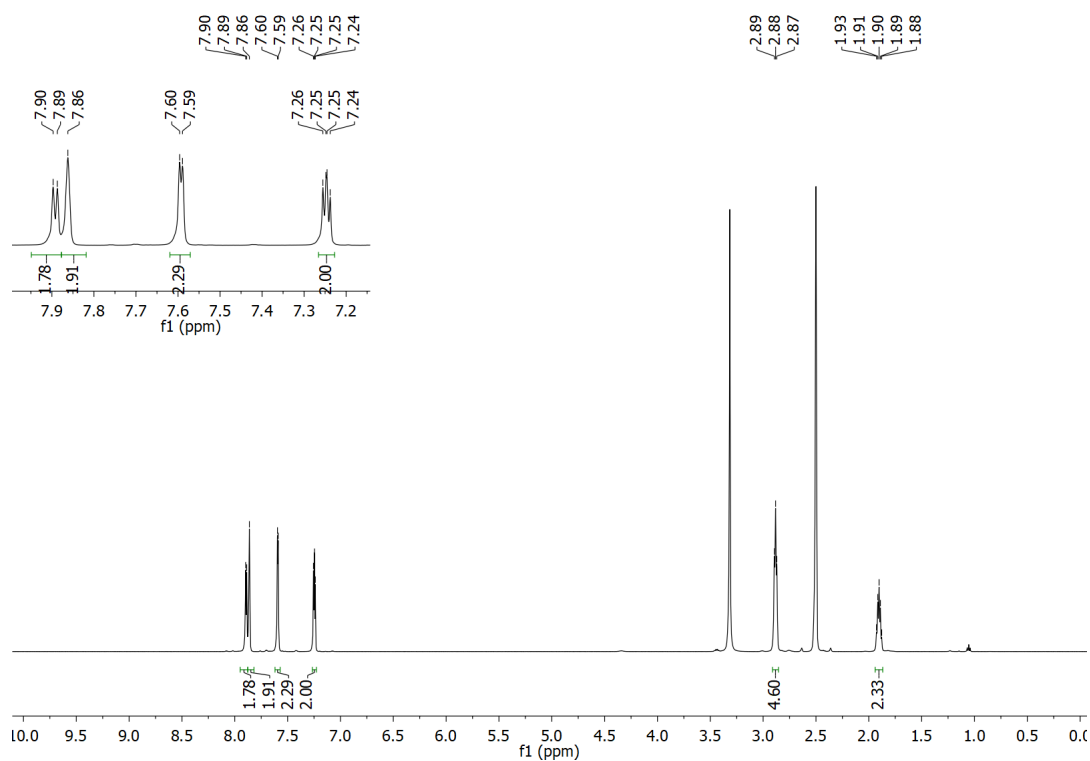

**Figure S21.** <sup>1</sup>H NMR spectrum of compound (2*E*,6*E*)-2,6-bis(thiophen-2-ylmethylene)cyclohexan-1-one **6b** in DMSO-*d*<sub>6</sub>.

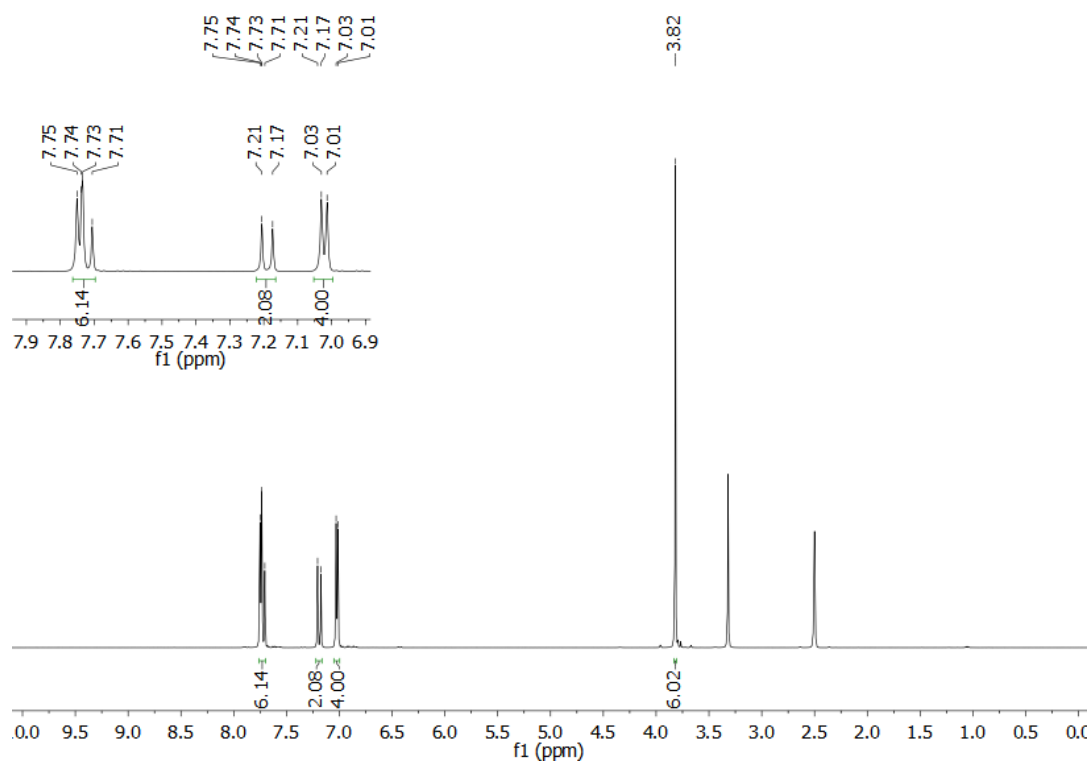

**Figure S22.** <sup>1</sup>H NMR spectrum of compound (1*E*,4*E*)-1,5-bis(4-methoxyphenyl)penta-1,4-dien-3-one **6c** in DMSO-*d*<sub>6</sub>.

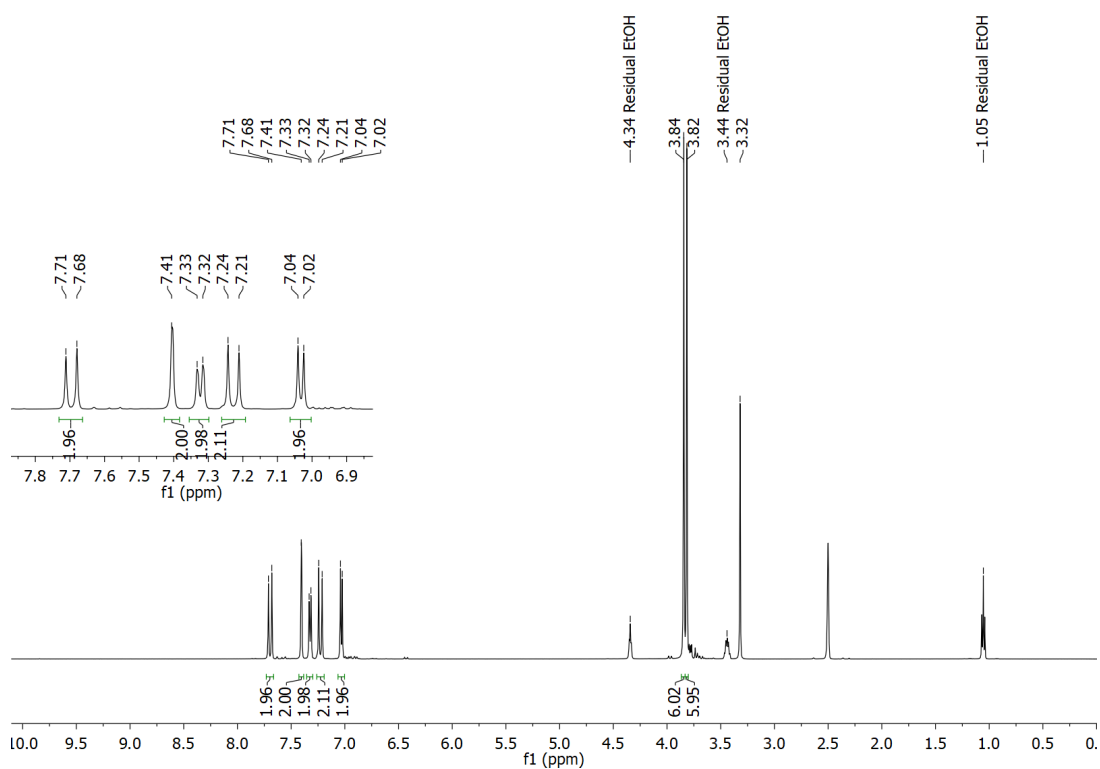

**Figure S23.**  $^1\text{H}$  NMR spectrum of compound (1*E*,4*E*)-1,5-bis(3,4-dimethoxyphenyl)penta-1,4-dien-3-one **6d** in  $\text{DMSO}-d_6$ .

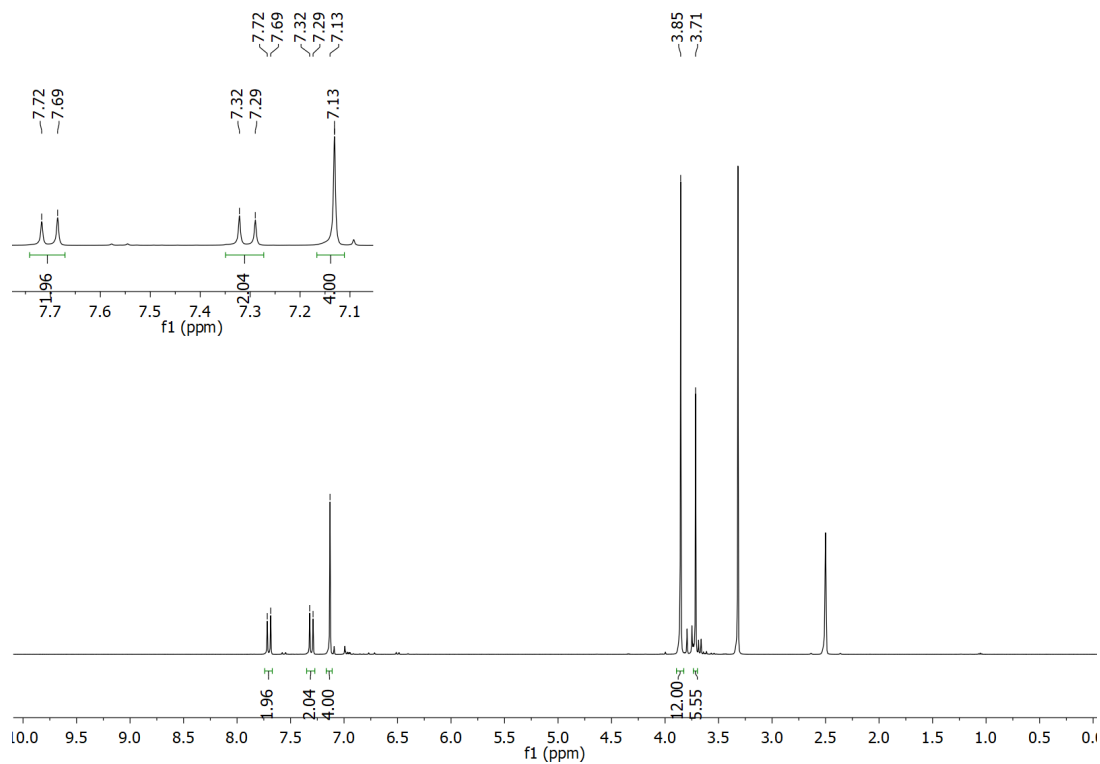

**Figure S24.**  $^1\text{H}$  NMR spectrum of compound (1*E*,4*E*)-1,5-bis(3,4,5-trimethoxyphenyl)penta-1,4-dien-3-one **6e** in  $\text{DMSO}-d_6$ .

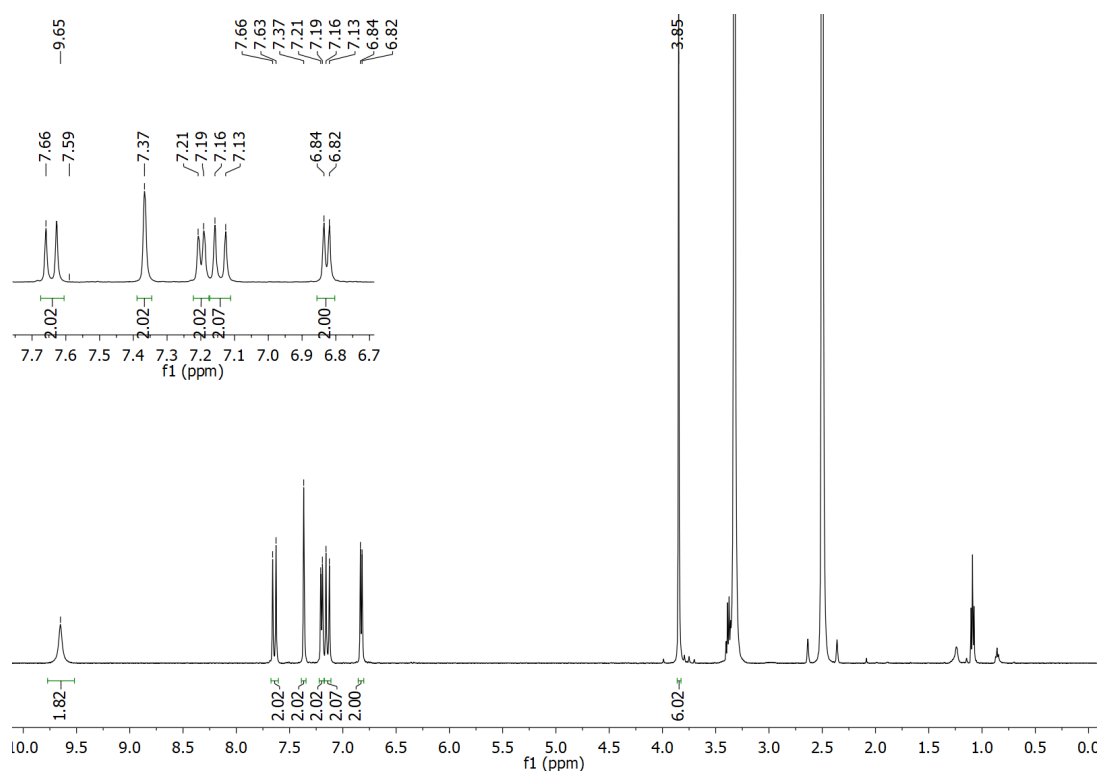

**Figure S25.** <sup>1</sup>H NMR spectrum of compound (1*E*,4*E*)-1,5-bis(4-hydroxy-3-methoxyphenyl)penta-1,4-dien-3-one **6f** in DMSO-*d*<sub>6</sub>.

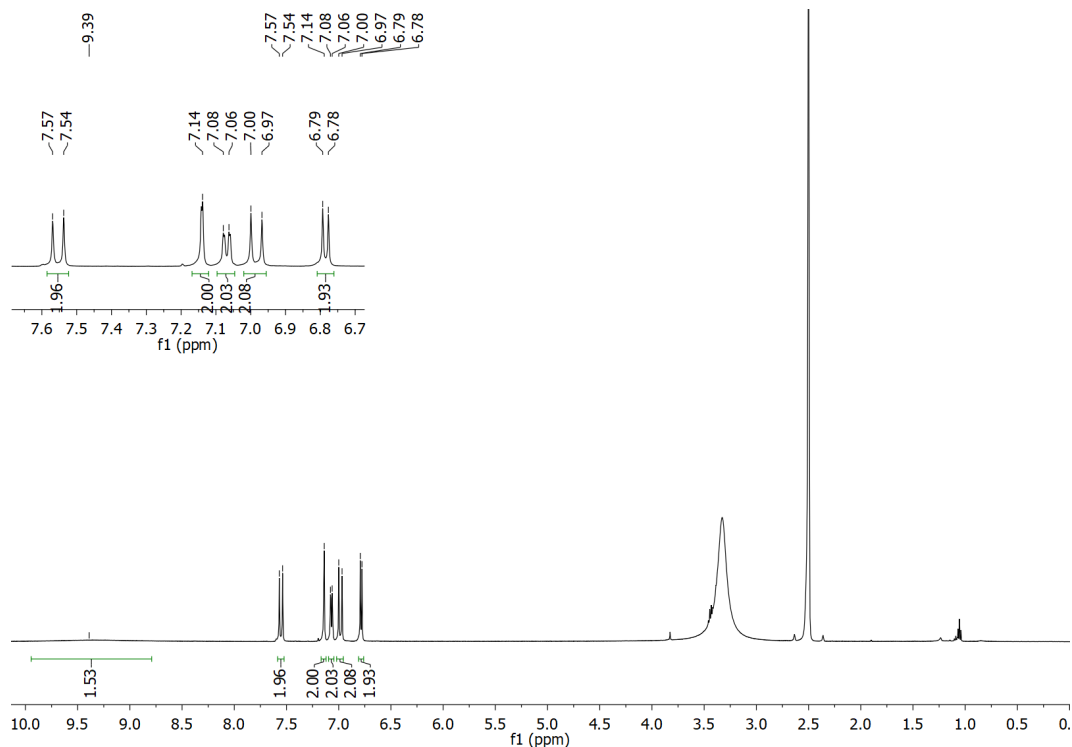

**Figure S26.** <sup>1</sup>H NMR spectrum of compound (1*E*,4*E*)-1,5-bis(3,4-dihydroxyphenyl)penta-1,4-dien-3-one **6g** in DMSO-*d*<sub>6</sub>.

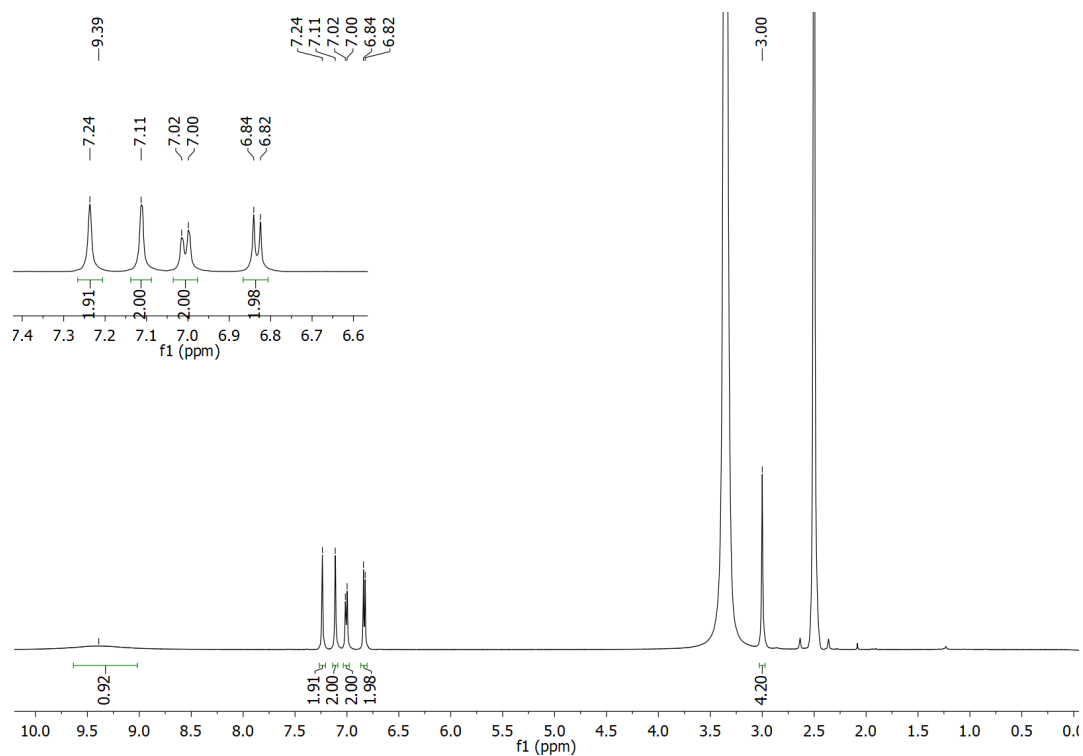

**Figure S27.**  $^1\text{H}$  NMR spectrum of compound 2,5-bis((*E*)-3,4-dihydroxybenzylidene)cyclopentan-1-one **6h** in  $\text{DMSO}-d_6$ .

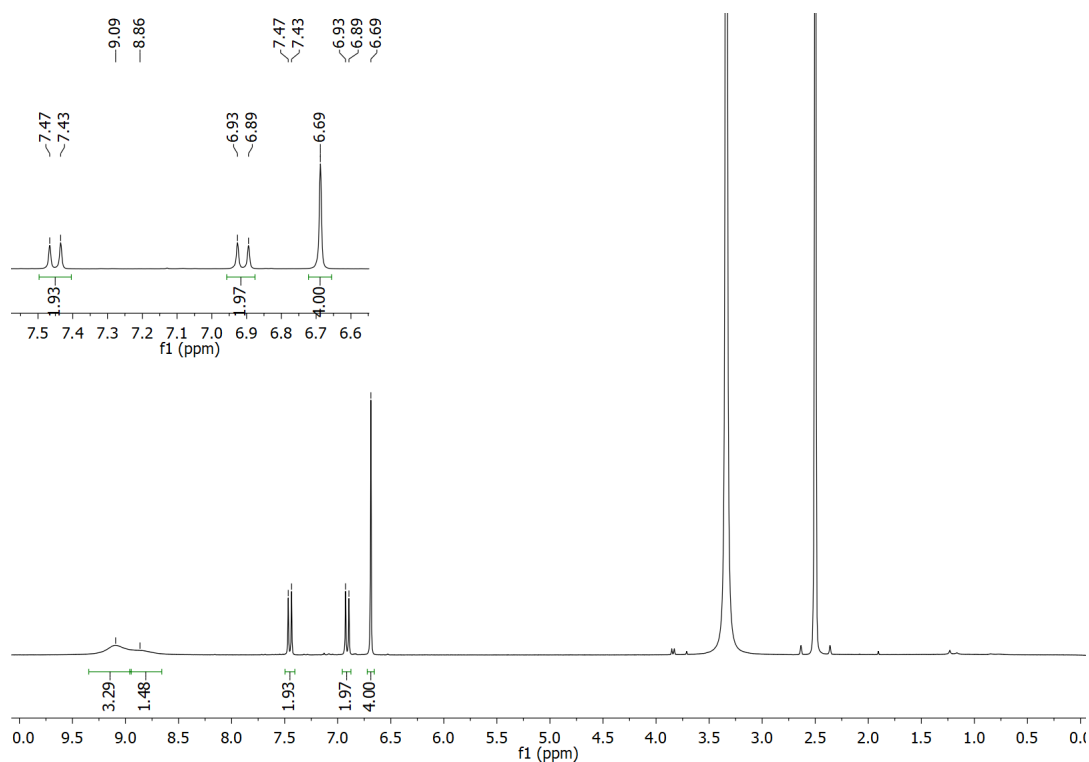

**Figure S28.**  $^1\text{H}$  NMR spectrum of compound (1*E*,4*E*)-1,5-bis(3,4,5-trihydroxyphenyl)penta-1,4-dien-3-one **6i** in  $\text{DMSO}-d_6$ .

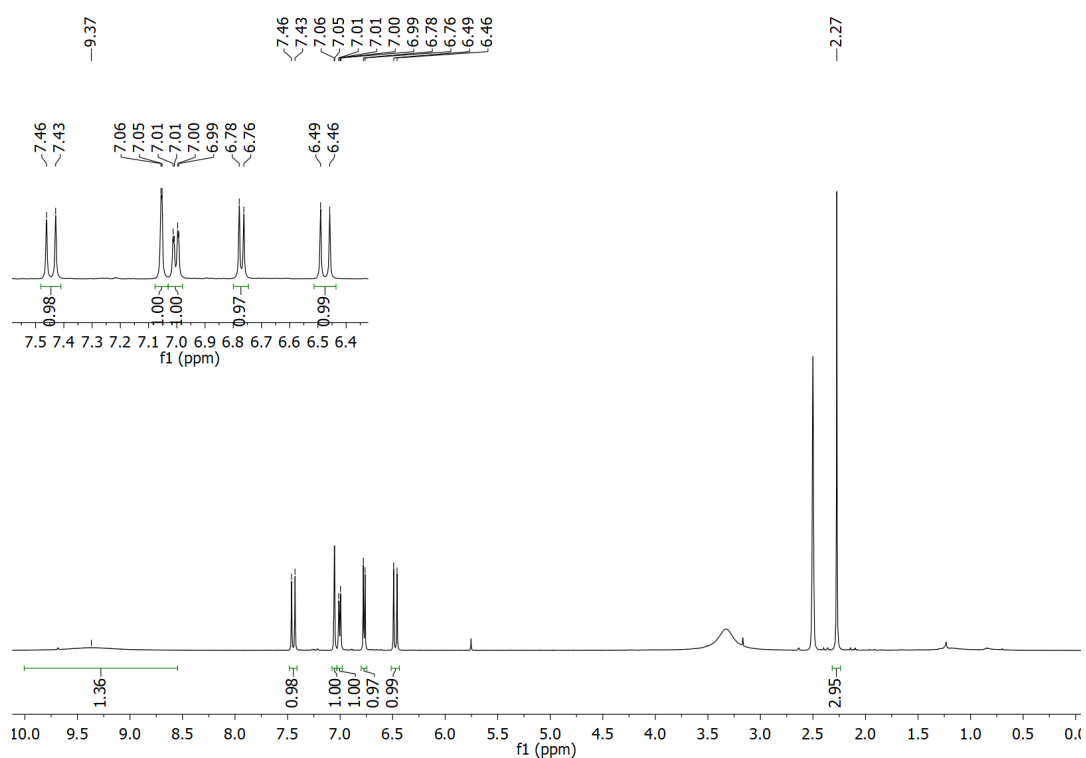

**Figure S29.** <sup>1</sup>H NMR spectrum of compound (E)-4-(3,4-dihydroxyphenyl)but-3-en-2-one **7a** in DMSO-*d*<sub>6</sub>.

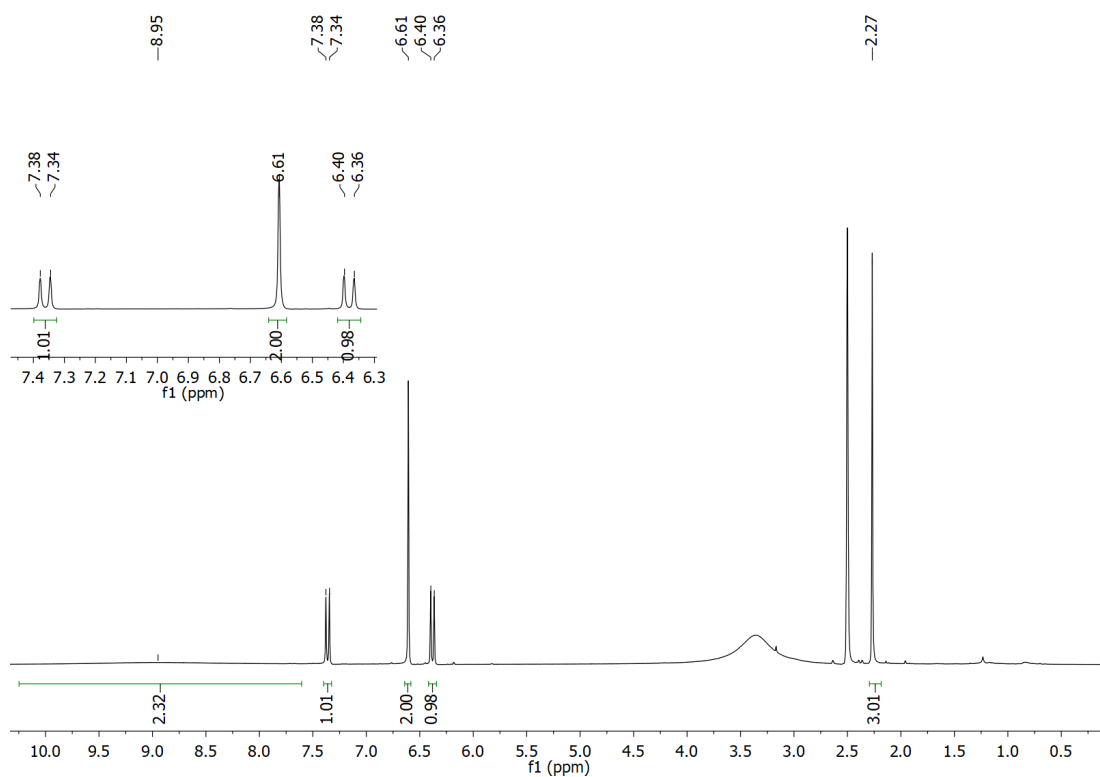

**Figure S30.** <sup>1</sup>H NMR spectrum of compound (E)-4-(3,4,5-trihydroxyphenyl)but-3-en-2-one **7b** in DMSO-*d*<sub>6</sub>.
